# Supplementary material for: GDF11 decreases bone mass by stimulating osteoclastogenesis and inhibiting osteoblast differentiation
Source: PubMed Central journal article supplement (PMC5036163; doi:10.1038/ncomms12794), 2016-09-22
Supplement: ncomms12794-s1.pdf [file ncomms12794-s1.pdf]

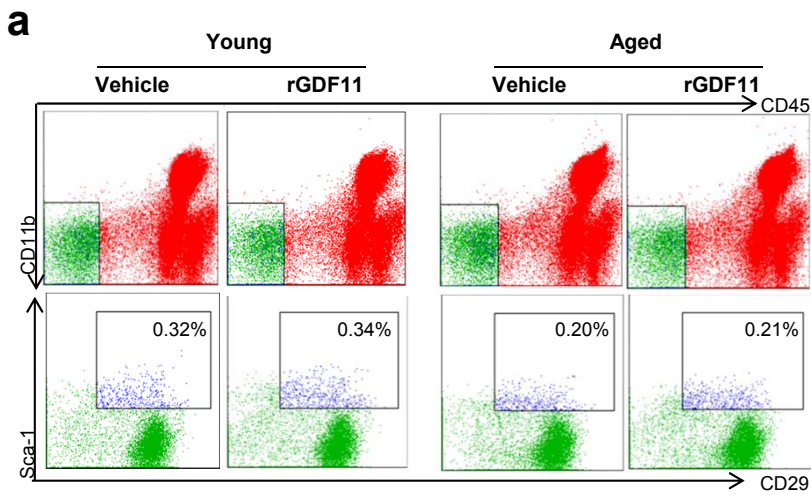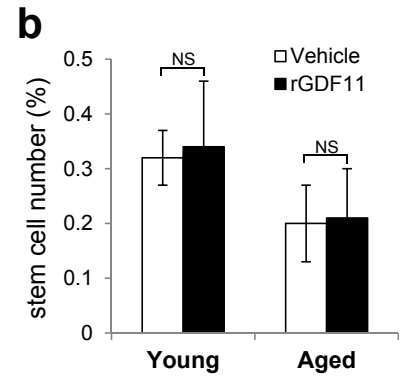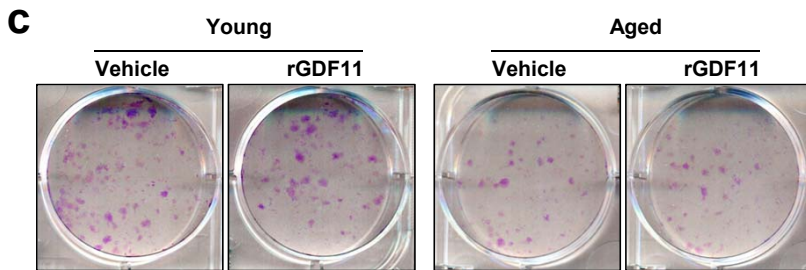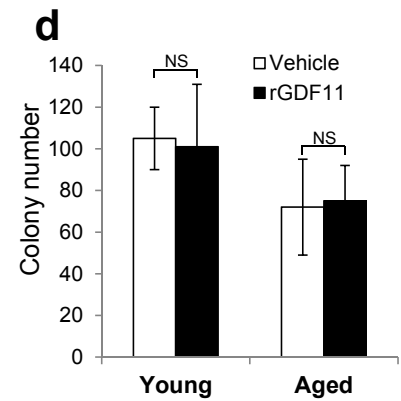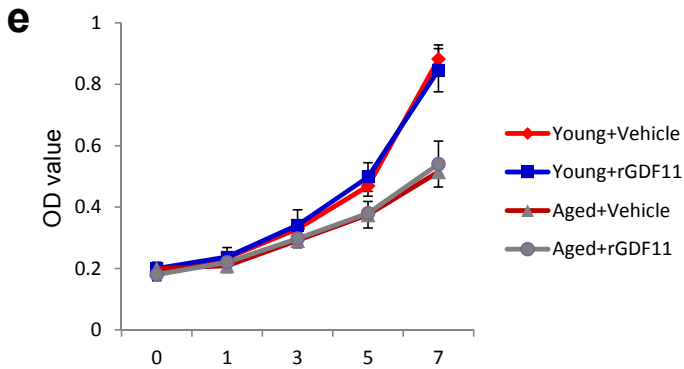

**Supplementary Figure 1. GDF11 treatment did not rejuvenate the BMSCs.** (a, b) Flow cytometry analysis of the bone marrow cells. (c, d) Colony formation assay of the sorted BMSCs. (e) Proliferation assay of the sorted BMSCs. Results are shown as mean  $\pm$  SD; n=6; NS: no significance by *t* test.

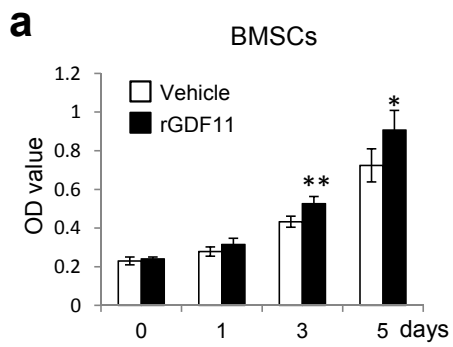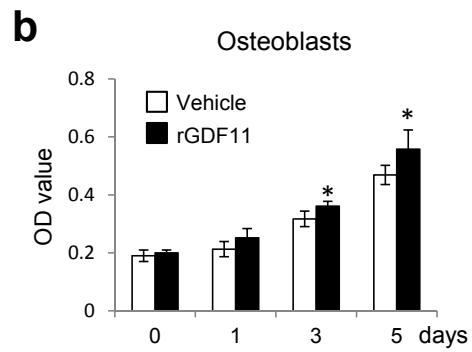

**Supplementary Figure 2. Proliferation assay.** GDF11 slightly increased the proliferation of both BMSCs (a) and primary calvarial osteoblasts (b). Cells were cultured in osteogenic differentiation medium. Results are shown as mean  $\pm$  SD; n=5; \*:  $p < 0.05$  and \*\*:  $p < 0.01$  by *t* test.

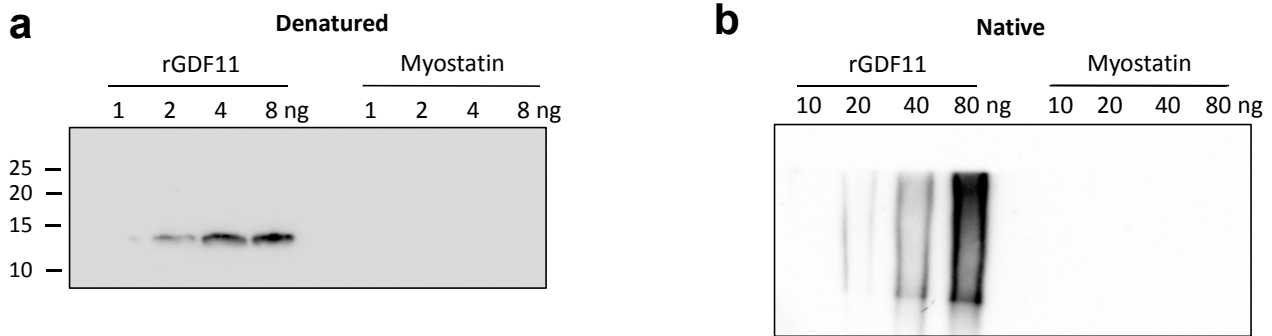

**Supplementary Figure 3. Western blot analysis using GDF11 antibody.** (a) Denatured Western blot.

The proteins were denatured at 95°C for 5 minutes in sample buffer containing 2% SDS and 1% 2-mercaptoethanol. (b) Native Western blot. The R&D GDF11 antibody (MAB19581, clone #743833)

binds specifically to GDF11 without cross reaction with myostatin.

**Fig. 4f**

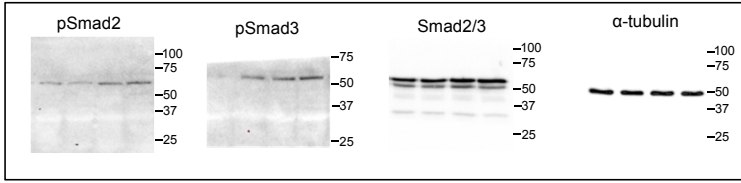

**Fig. 4g**

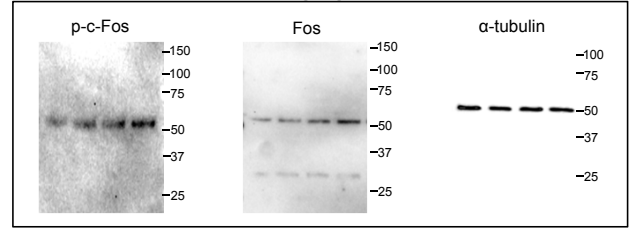

**Fig. 4i**

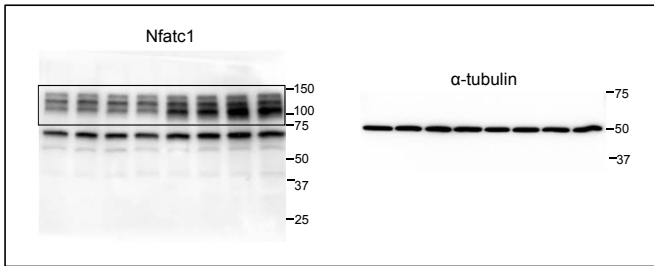

**Fig. 4k**

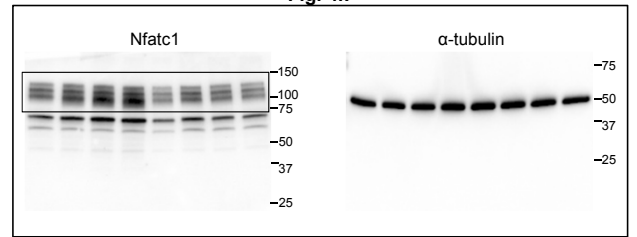

**Fig. 5i**

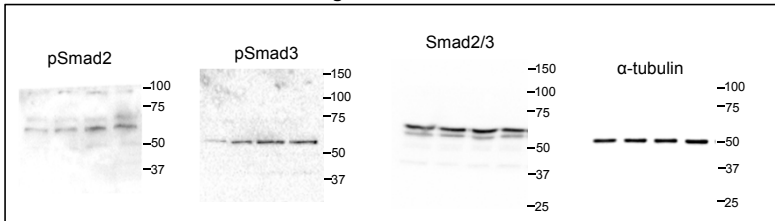

**Fig. 5k**

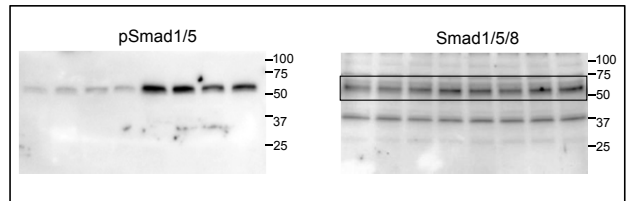

**Fig. 5l**

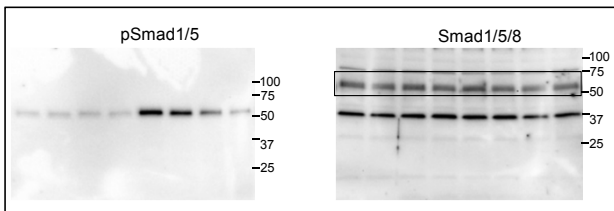

**Supplementary Figure 4. Uncropped images of immunoblots.**

**Supplementary table 1. Primers for quantitative RT-PCR and ChIP assay.**

---

| <b>RT-PCR primers</b>         |                         |
|-------------------------------|-------------------------|
| Nfatc1 F                      | GGAGAGTCCGAGAATCGAGAT   |
| Nfatc1 R                      | TTGCAGCTAGGAAGTACGTCT   |
| Fos F                         | CGGGTTTCAACGCCGACTA     |
| Fos R                         | TTGGCACTAGAGACGGACAGA   |
| Src F                         | GAACCCGAGAGGGACCTTC     |
| Src R                         | GAGGCAGTAGGCACCTTTTGT   |
| Acp5 F                        | CACTCCCACCCTGAGATTTGT   |
| Acp5 R                        | CATCGTCTGCACGGTTCTG     |
| Ctsk F                        | GAAGAAGACTCACCAGAAGCAG  |
| Ctsk R                        | TCCAGGTTATGGGCAGAGATT   |
| Runx2 F                       | GACTGTGGTTACCGTCATGGC   |
| Runx2 R                       | ACTTGGTTTTTCATAACAGCGGA |
| Osx F                         | ATGGCGTCCTCTCTGCTTG     |
| Osx R                         | TGAAAGGTCAGCGTATGGCTT   |
| Alp F                         | CACGGCCATCCTATATGGTAA   |
| Alp R                         | GGGCTGGTAGTTGTTGTGA     |
| Ocn F                         | CTGACCTCACAGATCCCAAGC   |
| Ocn R                         | TGGTCTGATAGCTCGTCACAAG  |
| Gapdh F                       | TCATTGACCTCAACTACATG    |
| Gapdh R                       | TCGCTCCTGGAAGATGGTGAT   |
| <br>                          |                         |
| <b>ChIP primers</b>           |                         |
| Nfatc1 F                      | GACTTTGTGTCCCCAGGAGG    |
| Nfatc1 R                      | GCAGAGGCAGAACACTTCCA    |
| Nfatc1 negative F (20kb down) | GTGCTGTGTGTTATGGCACC    |
| Nfatc1 negative R (20kb down) | CCTGGGGGCAGTGTTTACAG    |
| Ocn F                         | CTGAGCACATGACCCCCAAT    |
| Ocn R                         | TCGGCTACTCTGTGCTCTCT    |
| Ocn negative F (2kb down)     | AGAAGGCAGGTGTGTTGAGG    |
| Ocn negative R (2kb down)     | TGCTCTTCTGCCTCTACCT     |

---
